# Supplementary material for: An in vivo genetic screen for genes involved in spliced leader trans-splicing indicates a crucial role for continuous de novo spliced leader RNP assembly
Source: PubMed Central journal article supplement (PMC5737717; doi:10.1093/nar/gkx500), 2017-06-05
Supplement: gkx500_supp.pdf [file gkx500_supp.pdf]

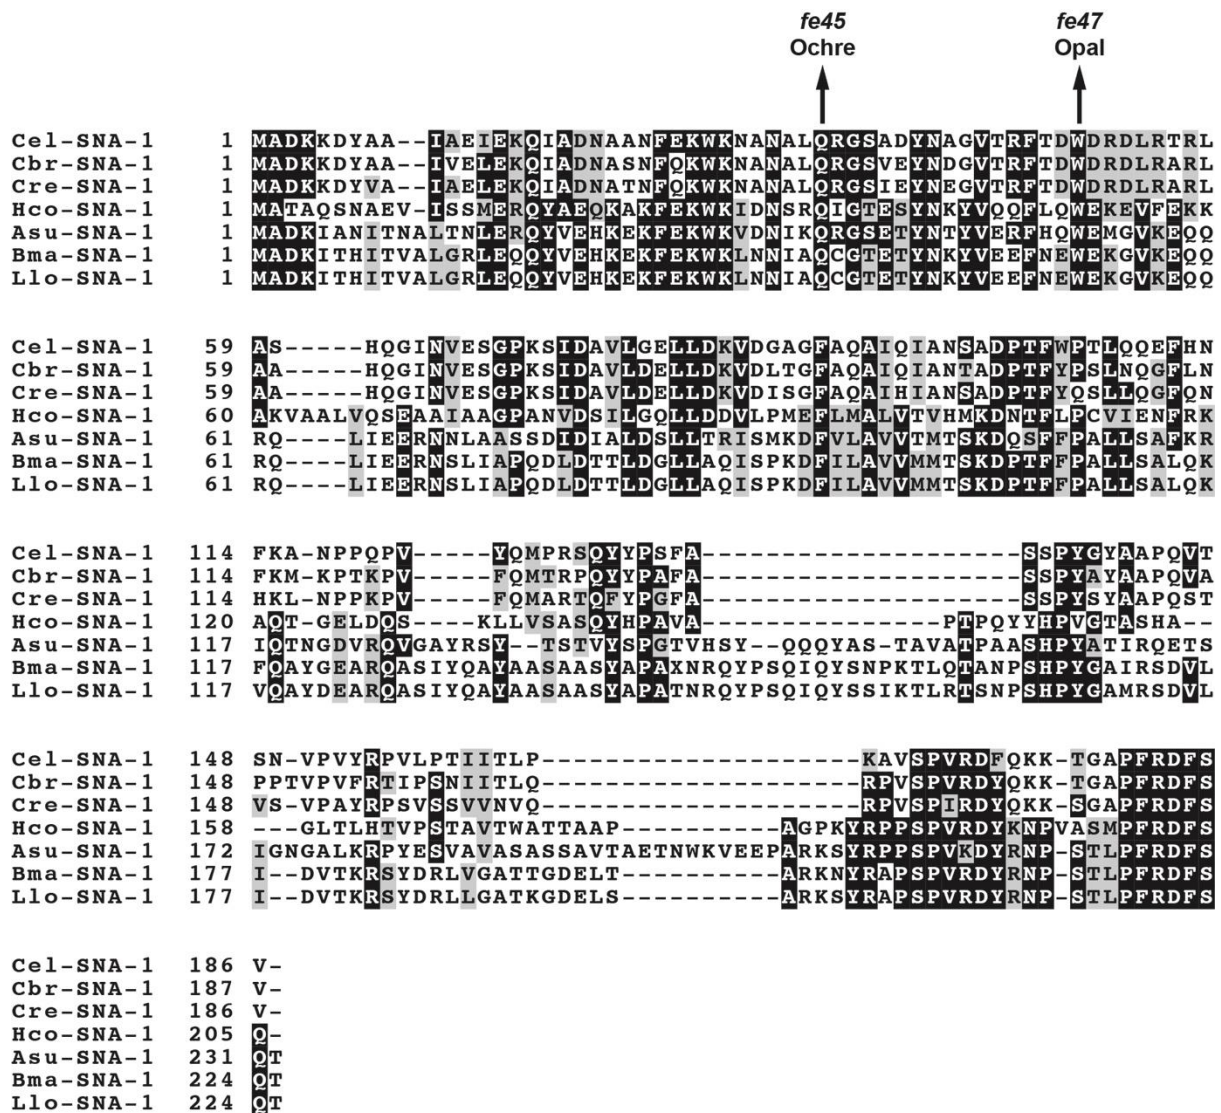

### Supplementary Figure 1. Multiple sequence alignment of SNA-1 homologues.

Arrows indicate the residues affected by the two *sna-1* mutations, and the nature of the resultant nonsense mutation. Residues conserved in more than 50% of the sequences are shaded (counter shading indicating identity and grey shading indicating similarity). Species key: Asu – *A. suum*; Bma – *B. malayi*; Cbr – *C. briggsae*; Cel – *C. elegans*; Cre – *C. remanei*; Hco – *H. contortus*; Llo – *L. loa*.

acggctcgattaaaattaaaattaaaattatcgaacggctcgattaaaattaaaattaaaat  
 tatcgaacggctcgattaaaattaaaattaaaattatc**ATG**ttttcaggaccggtagaaaa  
**GCT**agtaaaggagaagaacttttcactggagttgtcccaattcttgttgaattagatggtga  
 tgtaaatgggcacaaattttctgtcagtggagaggggtgaaggtgatgcaacatcggaaaac  
 ttacccttaaattttatgtgactactggaaaactacctgttccatgggtaagtttaaacata  
 tatataactaactaacctgattatttaaattttcagccaacacttgtcactactttctgtta  
 tgggtgttcaatgcttctcgagataccagatcatatgaaacggcatgactttttcaagagtg  
 ccatgcccgaaggttatgtacaggaaagaactatatttttcaaagatgacgggaactacaag  
 acacgtaagtttaaacagttcggtaactaactaacatacatatttaaattttcagggtgctga  
 agtcaagtttgaaggtgatacccttgtaataagaatcgagttaaaaggtattgattttaag  
 aagatggaaacattcttggacacaaattggaatacaactataactcacacaatgtatacatc  
 atggcagacaaacaaaagaatggaatcaaagttgtaagtttaaacatgattttactaactaa  
 ctaatctgatttaaattttcagaacttcaaaattagacacacattgaagatggaagcgcttc  
 aactagcagaccattatcaacaaaatactccaattggcgatggcctgtccttttaccagac  
 aaccattacctgtccacacaatctgccttttcgaaagatcccaacgaaaagagagacccacat  
 ggctccttcttgagtttgtaacagctgctgggattacacatggcatggatgaactatacaaat  
 ag

**Supplementary Figure 2. Sequence of the *gfp* reporter gene with outtron.** The original *gfp* start codon converted to GCT is shown in capital letters. The new ATG initiation codon is shown in red capital letters and is followed by a *trans*-splice site (underlined). Intron sequences are printed in grey. Arrows indicate positions of the primers for the detection of outtron *gfp* mRNA (green) and of internal *gfp* mRNA sequence (blue).

| Target         | Primer 1                                               | Primer 2                                                    |
|----------------|--------------------------------------------------------|-------------------------------------------------------------|
| <i>smn-1</i>   | <u>CCGCTCTAGA</u> ACTAGTGCGACATGGA<br>GGTAGACGAT       | <u>CGGTGGATCCACTAGT</u> CGGGAGGAATGGA<br>GTGAGAA            |
| <i>smi-1</i>   | <u>CCGCTCTAGA</u> ACTAGTGATCAAGAAG<br>CCTGTCTCGG       | <u>CGGTGGATCCACTAGT</u> AAAACAACGCGGA<br>GAAGGAG            |
| <i>icln-1</i>  | <u>CCGCTCTAGA</u> ACTAGTTGAAGTCAGC<br>CAGCCAAC         | <u>CGGTGGATCCACTAGT</u> CACGGGTCAATAAC<br>AACATGGA          |
| <i>F23F1.5</i> | <u>CCGCTCTAGA</u> ACTAGTAAGCTGCAGA<br>ACAACAAGCA       | <u>CGGTGGATCCACTAGT</u> ACCCAAAACGGTCC<br>AAAAC             |
| <i>snr-1</i>   | <u>CCGCTCTAGA</u> ACTAGTTTCATGAGGC<br>CGAAGGTCACA      | <u>CGGTGGATCCACTAGT</u> ATCTTACAGGGAAA<br>TCTCCGAAACC       |
| <i>snr-2</i>   | <u>CCGCTCTAGA</u> ACTAGTCCAACGCCTC<br>AAGATGACTATC     | <u>CGGTGGATCCACTAGT</u> CGAAGATTGGTGG<br>GTGATGG            |
| <i>snr-3</i>   | <u>CCGCTCTAGA</u> ACTAGTTAGAAAAATG<br>AAGTTGGTCAGATTCC | <u>CGGTGGATCCACTAGT</u> ATTGAAGAAATTT<br>ATAGAGATCAGAACG    |
| <i>snr-4</i>   | <u>CCGCTCTAGA</u> ACTAGTAGCCAAACCC<br>CGTTCAGAGATG     | <u>CGGTGGATCCACTAGT</u> CATTGAAACGAAAC<br>AACAGGGTGAAC      |
| <i>snr-5</i>   | <u>CCGCTCTAGA</u> ACTAGTAATGTCCGCA<br>GTTCAACCAG       | <u>CGGTGGATCCACTAGT</u> GATAATTATAATT<br>TATTGATTAAGAATGTGC |
| <i>snr-6</i>   | <u>CCGCTCTAGA</u> ACTAGTGAAAGCTCAA<br>CAAAGTGATGGTTCAG | <u>CGGTGGATCCACTAGT</u> TTAGGCTTCTTGTT<br>GGGCGG            |
| <i>snr-7</i>   | <u>CCGCTCTAGA</u> ACTAGTAAAATGAGTA<br>AGACACATCCACCAG  | <u>CGGTGGATCCACTAGT</u> GAGTTTCCGCGAAT<br>GACAG             |
| <i>lsm-1</i>   | <u>CCGCTCTAGA</u> ACTAGTGCCCGATCCC<br>TATTTACCC        | <u>CGGTGGATCCACTAGT</u> ATTCATGCATCGTG<br>TTCTTCTG          |
| <i>gut-2</i>   | <u>CCGCTCTAGA</u> ACTAGTATGCTGTTCT<br>TCTCATTCTTCA     | <u>CGGTGGATCCACTAGT</u> CGTGGATTTACTGT<br>TTTGCC            |
| <i>lsm-3</i>   | <u>CCGCTCTAGA</u> ACTAGTGGCCACCGAA<br>AAGAAAGAAG       | <u>CGGTGGATCCACTAGT</u> AATGATGACGATG<br>AATTAGGATGC        |

|                 |                                                        |                                                         |
|-----------------|--------------------------------------------------------|---------------------------------------------------------|
| <i>lsm-4</i>    | <u>CCGCTCTAGA</u> ACTAGTATGGTGTTGC<br>CACTTTCTCTTCT    | <u>CGGTGGATCCACTAGT</u> CGTCCTCCTCGTCC<br>ACCA          |
| <i>lsm-5</i>    | <u>CCGCTCTAGA</u> ACTAGTCCATGGCAAC<br>CTCAACATC        | <u>CGGTGGATCCACTAGT</u> TTAAATCTCTGGTC<br>CTTCTCCTC     |
| <i>lsm-6</i>    | <u>CCGCTCTAGA</u> ACTAGTGAAAATGAGC<br>AAACGACAGAATC    | <u>CGGTGGATCCACTAGT</u> TTATTTTCGTGATG<br>TGGAGATGT     |
| <i>lsm-7</i>    | <u>CCGCTCTAGA</u> ACTAGTGAAAGACGAA<br>GGAAAACGAAAG     | <u>CGGTGGATCCACTAGT</u> TTATTCTTCTTCT<br>GGGTTGC        |
| <i>lsm-8</i>    | <u>CCGCTCTAGA</u> ACTAGTAATATGACTT<br>CAACTCTAGATGCGTA | <u>CGGTGGATCCACTAGT</u> TGTGGAAATTATT<br>GGGGAATC       |
| <i>K07A1.15</i> | <u>CCGCTCTAGA</u> ACTAGTGACTCGAATC<br>TGGATGTGGTGC     | <u>CGGTGGATCCACTAGT</u> CTGTTTCTGATCAA<br>GTCGCCG       |
| <i>M142.5</i>   | <u>CCGCTCTAGA</u> ACTAGTTTCGACACGA<br>CTCGCAAGGTT      | <u>CGGTGGATCCACTAGT</u> GCCACAATAGCTCC<br>AATAGTGAAATC  |
| <i>C48H3.4</i>  | <u>CCGCTCTAGA</u> ACTAGTGAAGGGGTCG<br>AAGGAAATAGTG     | <u>CGGTGGATCCACTAGT</u> GAAACAGTTTCCGTA<br>ACATCTTTCATC |

**Supplementary Table S1.** Primers for the amplification of targets for RNAi feeding vector production. Sequences derived from pPD129.36 and included for In-Fusion cloning are underlined.

| <b>qPCR assays</b>         |                                |                                              |                                           |                      |                 |                         |                |
|----------------------------|--------------------------------|----------------------------------------------|-------------------------------------------|----------------------|-----------------|-------------------------|----------------|
| Target                     | Primers                        | Primer location <sup>1</sup>                 | Similarity to <i>E. coli</i> <sup>A</sup> | UPL probe (sequence) | Amplicon Length | Efficiency <sup>B</sup> | R <sup>2</sup> |
| Outron <i>gfp</i> mRNA     | TAAAATTATCATG<br>TTTTTCAGGAC   | <i>gfp</i> reporter (supplementary Figure 2) | no primer binding sites                   | 9<br>(TGGTGATG)      | 147 bp          | 1.982                   | 0.957          |
|                            | GTTGCATCACCTT<br>CACCTC        | <i>gfp</i> reporter (supplementary Figure 2) | no primer binding sites                   |                      |                 |                         |                |
| Internal <i>gfp</i> mRNA   | CCACATGGTCCTT<br>CTTGAGTTT     | <i>gfp</i> reporter (supplementary Figure 2) | no primer binding sites                   | 3<br>(CTGCTGGG)      | 62 bp           | 1.969                   | 0.955          |
|                            | ATAGTTCATCCAT<br>GCCATGTGTA    | <i>gfp</i> reporter (supplementary Figure 2) | no primer binding sites                   |                      |                 |                         |                |
| Outron- <i>rps-3</i> mRNA  | TATATTTCTTGTG<br>TTTTGTTCGGATT | chrIII: 6206726-6206751                      | no primer binding sites                   | 46<br>(ATGGCTGC)     | 140 bp          | 1.932                   | 0.993          |
|                            | ACGGCCTTCTTCT<br>TCTTGGT       | chrIII: 6206846-6206865                      | no primer binding sites                   |                      |                 |                         |                |
| Internal <i>rps-3</i> mRNA | TCCTTCCAAAGGA<br>ACCACAC       | chrIII: 6207842-6207861                      | no primer binding sites                   | 63<br>(AGGAGGA)      | 62 bp           | 1.967                   | 0.993          |
|                            | TGCTGGGACTTGA<br>ACATCCT       | chrIII: 6207884-6207903                      | no primer binding sites                   |                      |                 |                         |                |

**Supplementary Table S2.** qPCR assays were designed using the Universal Probe Library Assay Design Centre (Roche). <sup>A</sup> BLAST searches were done at NCBI against *Caenorhabditis elegans* (taxid:6239), *Escherichia coli* K-12 (taxid:83333) and OP50 (taxid:637912). No *E. coli* sequences with  $\geq 75\%$  sequence identity were found, and primers, and primer combinations, were specific for *gfp* and *rps-3* mRNA. Each primer pair was tested on serial template dilutions. 10-fold serial dilutions of LP6 plasmid (covering a range from 0.1 ng/ $\mu$ l to 1 fg/ $\mu$ l) were used for primers detecting the *gfp* reporter mRNA, and 10-fold serial dilutions of N2 genomic DNA (covering a range from 70 ng/ $\mu$ l to 70 fg/ $\mu$ l) for primers detecting *rps-3* mRNA. C<sub>q</sub> values of the dilution series were plotted in Microsoft Excel and used for linear regression curve fitting. The qPCR primer Efficiency<sup>(B)</sup> was calculated from the resulting slope according to the equation:  $E = (10^{[-1/\text{slope}]})$ . R<sup>2</sup> calculated for the linear regression is also show.

| <b>PCR assays</b>                                                                                                                 |                                     |                                                                                        |                                                                                     |
|-----------------------------------------------------------------------------------------------------------------------------------|-------------------------------------|----------------------------------------------------------------------------------------|-------------------------------------------------------------------------------------|
| Target                                                                                                                            | Primers                             | Primer location                                                                        | Amplicon Length<br>(genomic DNA/cDNA)                                               |
| <i>act-1</i> ,<br><i>act-2</i> ,<br><i>act-3</i>                                                                                  | CGTGGTTACTCTT<br>TCACCACCACCGC<br>T | chrV:11,081,709-11,081,735<br>chrV:11,077,468-11,077,494<br>chrV:11,072,581-11,072,607 | <i>act-1</i> : 562/510 bp<br><i>act-2</i> : 561/510 bp<br><i>act-3</i> : 563/509 bp |
|                                                                                                                                   | GGACTCGTCGTAT<br>TCTTGCTTGGAGA<br>T | chrV:11,082,244-11,082,270<br>chrV:11,076,934-11,076,959<br>chrV:11,072,045-11,072,071 |                                                                                     |
| <i>dab-1</i>                                                                                                                      | TATGGACGCATT<br>GGTTGGT             | chrII:8,228,308-8,228,326                                                              | 228/100 bp                                                                          |
|                                                                                                                                   | CGACATGGAGTT<br>CAGAGAAGC           | chrII:8,228,515-8,228,535                                                              |                                                                                     |
| <b>Supplementary Table S3.</b> PCR assays. The PCR assay for the detection of actin transcripts has been described elsewhere (1). |                                     |                                                                                        |                                                                                     |

## REFERENCES

1. Keall,R., Whitelaw,S., Pettitt,J. and Müller,B. (2007) Histone gene expression and histone mRNA 3' end structure in *Caenorhabditis elegans*. *BMC Mol Biol.*, **8**, 51.
